# Supplementary material
Source: ML conference proceedings conference paper supplement (https://openreview.net/forum?id=L3RYBqzRmF)
Supplement: supplementary_material [file attachment]

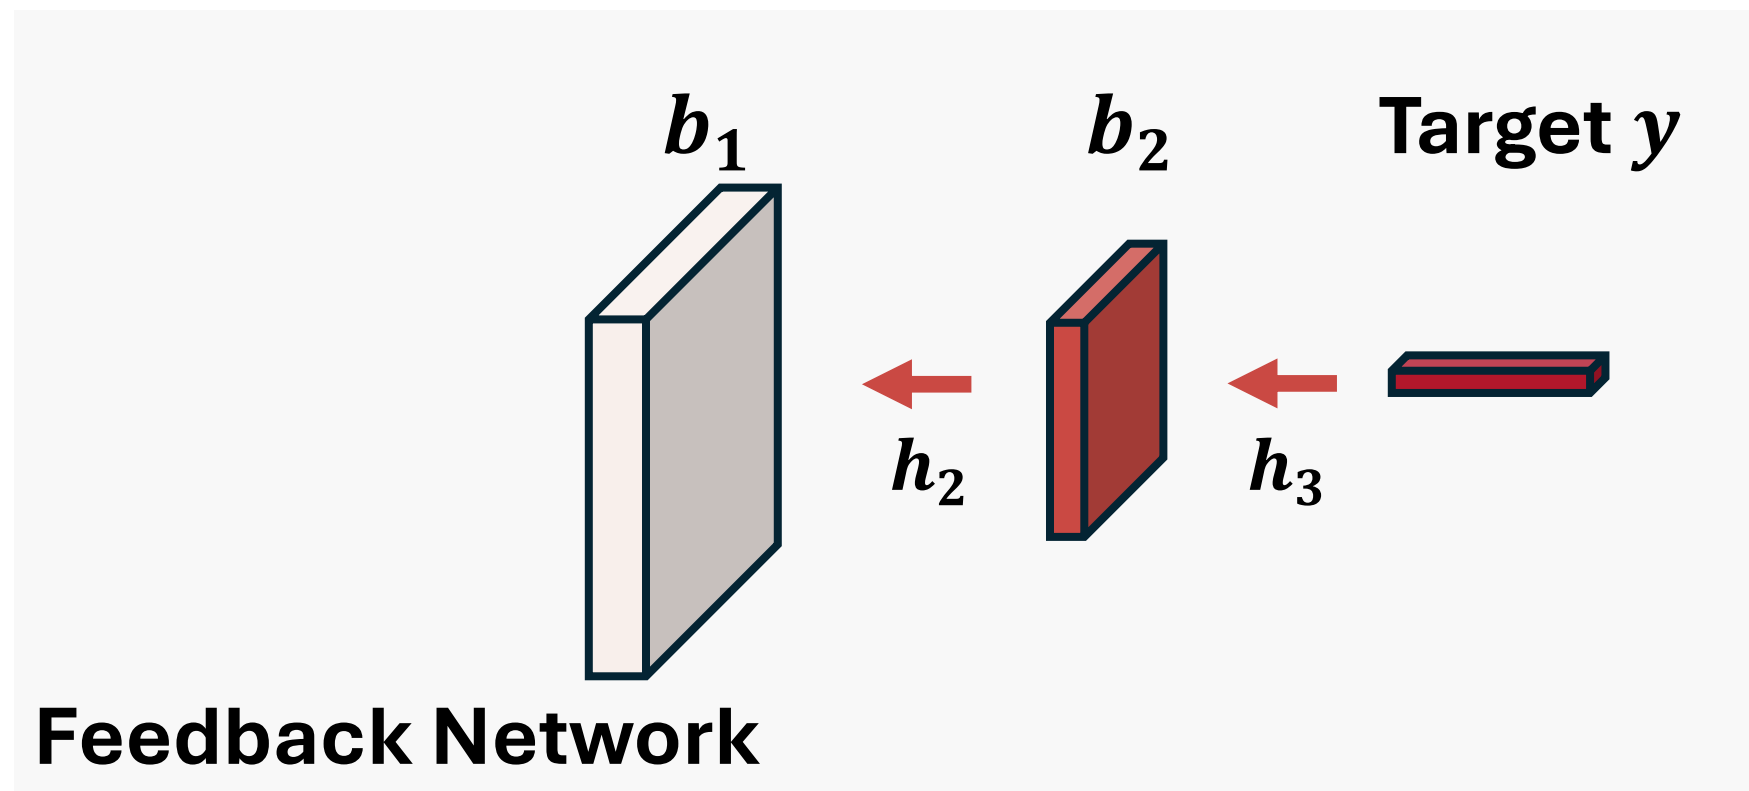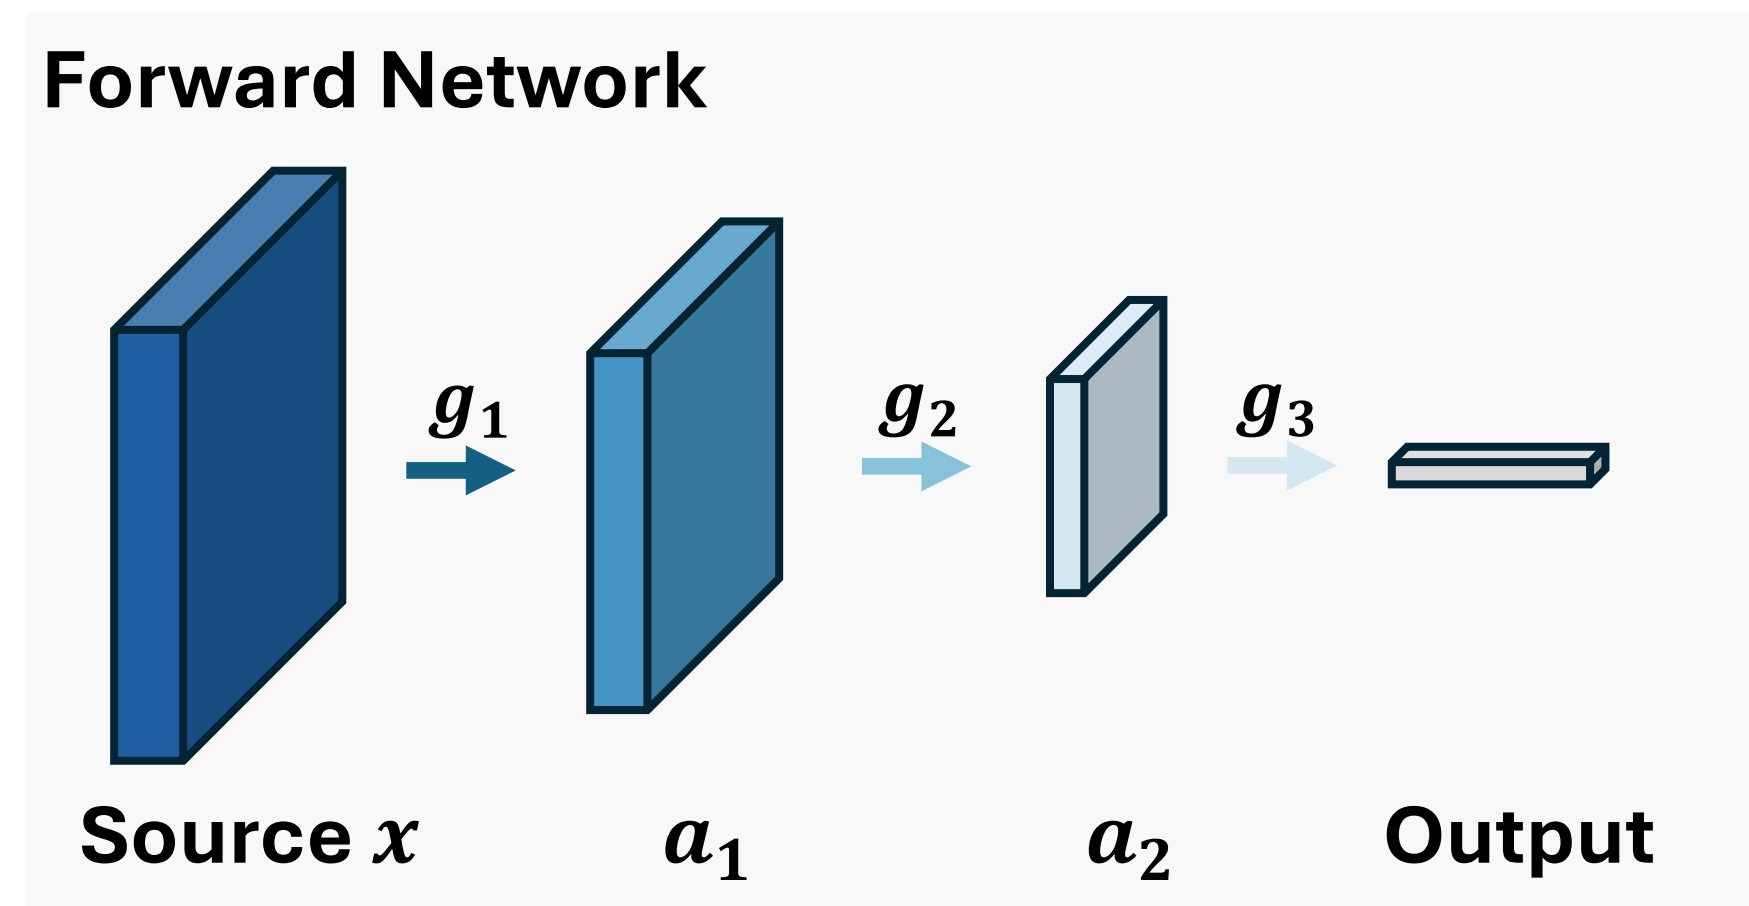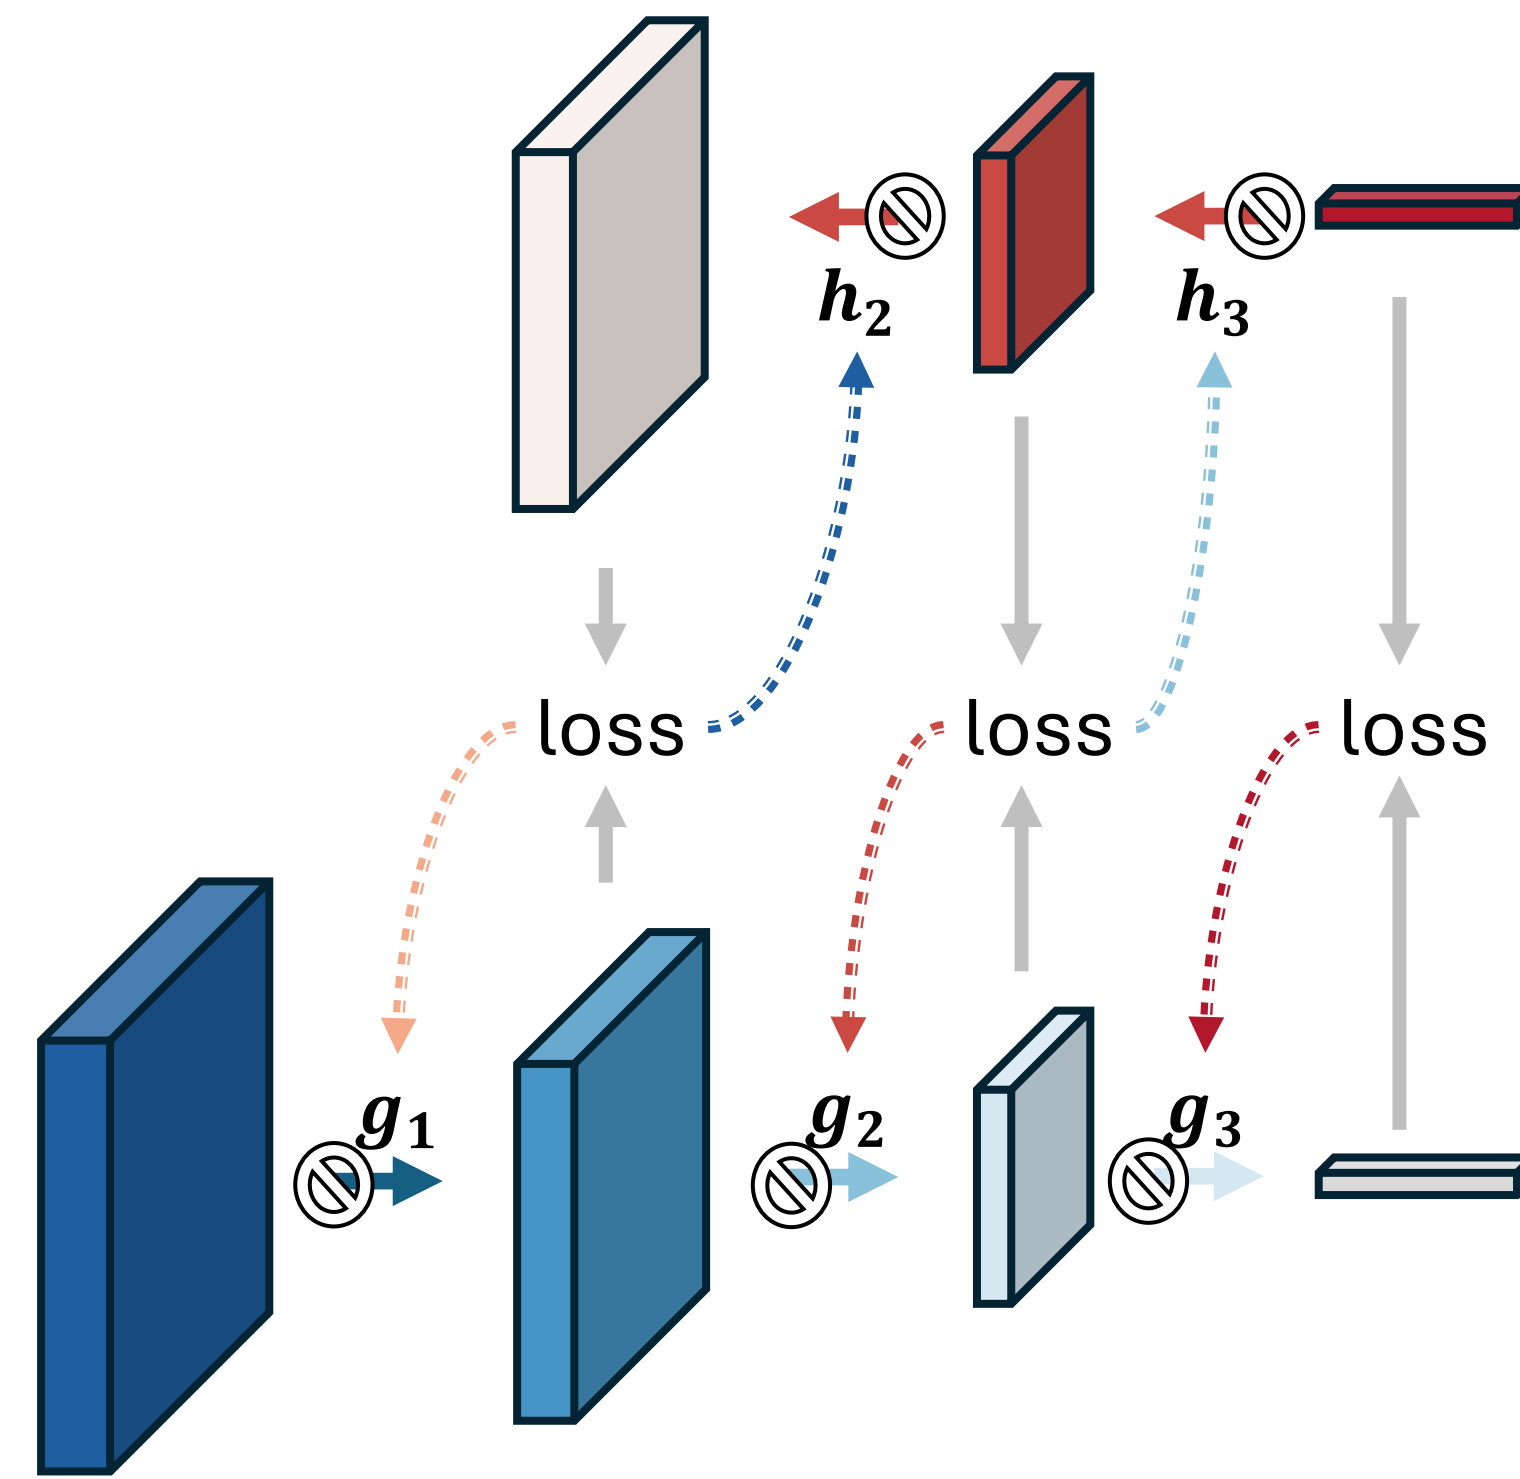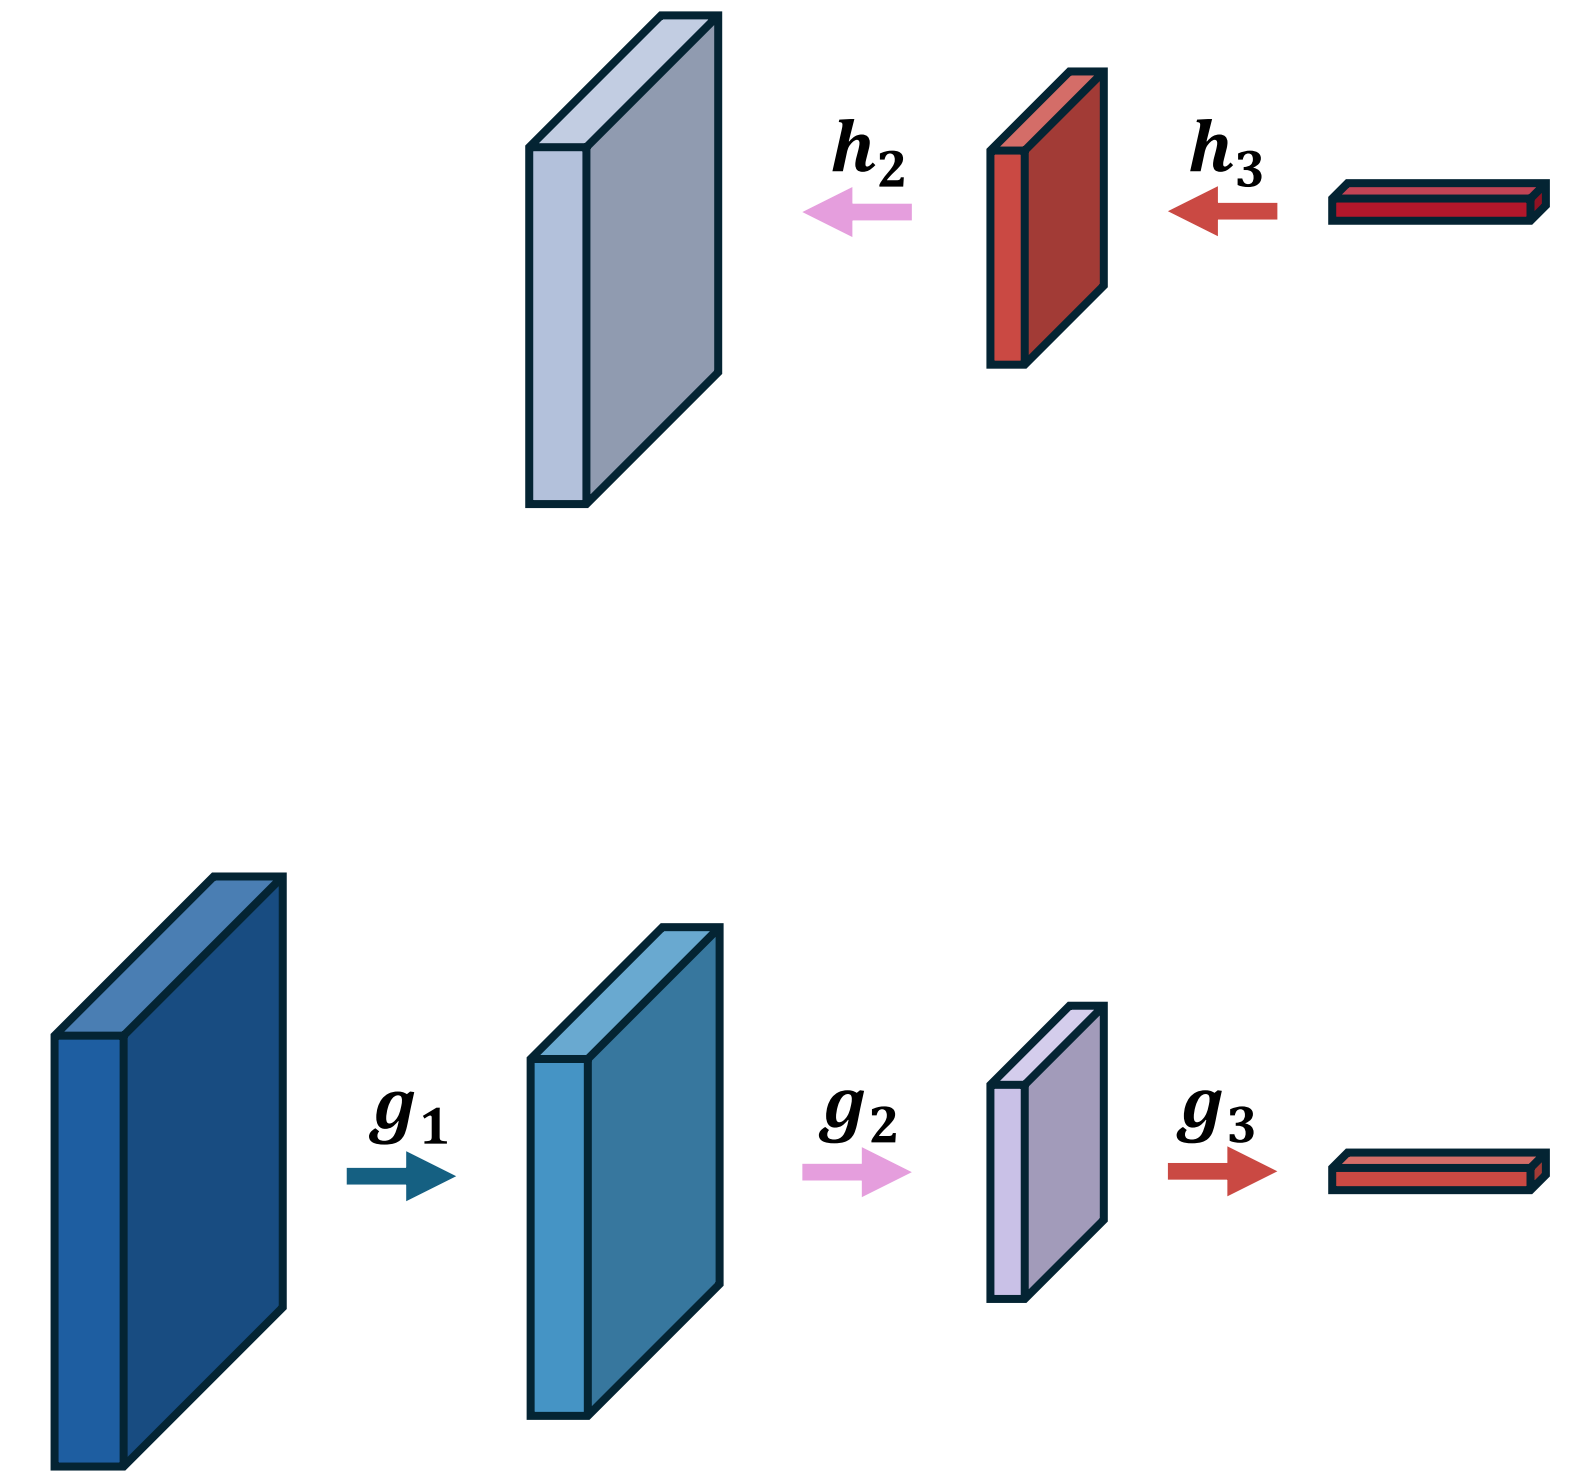

Before Training

During Counter-Current Learning

After Training

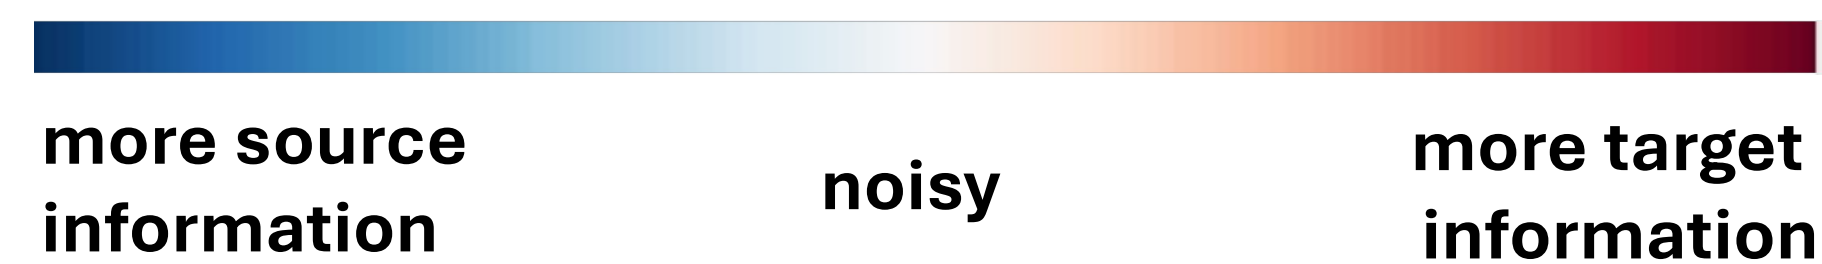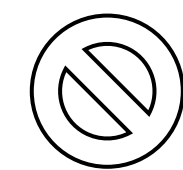

stop gradient operation  
(gradient detach)

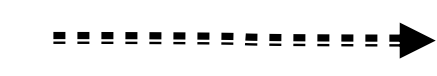

gradient flow
